# Supplementary material for: Effect of Intramyocardial Grafting Collagen Scaffold With Mesenchymal Stromal Cells in Patients With Chronic Ischemic Heart Disease: A Randomized Clinical Trial
Source: PubMed Central journal article supplement (PMC7489863; doi:10.1001/jamanetworkopen.2020.16236), 2020-09-10
Supplement: jamanetwopen-e2016236-s003.pdf [file jamanetwopen-e2016236-s003.pdf]

## Data Sharing Statement

He. Effect of Intramyocardial Grafting Collagen Scaffold With Mesenchymal Stromal Cells in Patients With Chronic Ischemic Heart Disease. *JAMA Netw Open*. Published September 10, 2020. 10.1001/jamanetworkopen.2020.16236

### Data

**Data available:** No

### Additional Information

**Explanation for why data not available:** The data used to support the findings of this study are available from the corresponding author upon request.
